# Supplementary material for: Use of Both Cumulus Cells’ Transcriptomic Markers and Zona Pellucida Birefringence to Select Developmentally Competent Oocytes in Human Assisted Reproductive Technologies
Source: PubMed Central journal article supplement (PMC4315169; doi:10.1186/1471-2164-16-s1-s9), 2015-01-15
Supplement: 1471-2164-16-S1-S9-S1.pdf [file 1471-2164-16-S1-S9-S1.pdf]

**Supplemental table 1: List of over-expressed genes in ZGP versus ZBNP groups (ZGP/ZBNP ratio  $\geq 2$ ) following microarray analysis at FDR=5%**

|    | Gene           | GenBank name                                                                                           | Fold         |
|----|----------------|--------------------------------------------------------------------------------------------------------|--------------|
| 1  | <b>MOBK1B</b>  | Homo sapiens MOB1, Mps One Binder kinase activator-like 1B (yeast)                                     | <b>6.443</b> |
| 2  | <b>ZNF793</b>  | Homo sapiens zinc finger protein 793 (ZNF793), mRNA                                                    | <b>5.44</b>  |
| 3  | <b>RPL9</b>    | Homo sapiens ribosomal protein L9, mRNA (cDNA clone MGC:87207                                          | <b>5.267</b> |
| 4  | <b>GGNBP2</b>  | Bos taurus similar to zinc finger protein 403,transcript variant 2                                     | <b>5.207</b> |
| 5  | <b>PSMD6</b>   | Bos taurus proteasome (prosome, macropain) 26S subunit, non-ATPase,                                    | <b>5.162</b> |
| 6  | <b>RBMS2</b>   | Homo sapiens RNA binding motif, single stranded interacting protein 2 (RBMS2), mRNA                    | <b>4.542</b> |
| 7  | <b>RAN</b>     | Bos taurus RAN, member RAS oncogene family, mRNA (cDNA clone                                           | <b>4.535</b> |
| 8  | <b>KIF13B</b>  | <u>kinesin family member 13B</u>                                                                       | <b>4.38</b>  |
| 9  | <b>CCAR1</b>   | Bos taurus cell division cycle and apoptosis regulator 1 (CCAR1),                                      | <b>4.278</b> |
| 10 | <b>CALM1</b>   | Homo sapiens calmodulin 1 (phosphorylase kinase, delta) (CALM1                                         | <b>4.136</b> |
| 11 | <b>PPM1G</b>   | Homo sapiens protein phosphatase 1G (formerly 2C), magnesium-dependent, gamma isoform                  | <b>4.113</b> |
| 12 | <b>THOC2</b>   | Homo sapiens THO complex 2, mRNA (cDNA clone IMAGE:5556338), partial cds                               | <b>3.804</b> |
| 13 | <b>HBA2</b>    | Bos taurus hemoglobin alpha chain, mRNA (cDNA clone MGC:157272                                         | <b>3.688</b> |
| 14 | <b>EIF4GI</b>  | PREDICTED: Bos taurus eukaryotic translation initiation factor eIF4GI protein (EIF4GI), mRNA           | <b>3.453</b> |
| 15 | <b>FAM73A</b>  | Homo sapiens family with sequence similarity 73, member A (FAM73A),                                    | <b>3.429</b> |
| 16 | <b>TIE1</b>    | Homo sapiens tyrosine kinase with immunoglobulin-like and EGF-like domains 1                           | <b>3.393</b> |
| 17 | <b>SYT11</b>   | Bos taurus synaptotagmin XI (SYT11), mRNA                                                              | <b>3.271</b> |
| 18 | <b>SGCB</b>    | Bos taurus sarcoglycan, beta (43kDa dystrophin-associated glycoprotein) (SGCB), mRNA.                  | <b>3.141</b> |
| 19 | <b>DDX51</b>   | Homo sapiens DEAD (Asp-Glu-Ala-Asp) box polypeptide 51 (DDX51),                                        | <b>3.116</b> |
| 20 | <b>PRRT2</b>   | Homo sapiens proline-rich transmembrane protein 2 (PRRT2), mRNA                                        | <b>3.109</b> |
| 21 | <b>PSIP1</b>   | Homo sapiens PC4 and SFRS1 interacting protein 1 (PSIP1),                                              | <b>3.093</b> |
| 22 | <b>GABARAP</b> | Homo sapiens GABA(A) receptor-associated protein (GABARAP), mRNA                                       | <b>3.042</b> |
| 23 | <b>RDH11</b>   | PREDICTED: Bos taurus retinol dehydrogenase 11 (all-trans/9-cis/11-cis) (RDH11), transcript variant X1 | <b>2.833</b> |
| 24 | <b>MRPS18B</b> | PREDICTED: Bos taurus similar to Mitochondrial 28S ribosomal protein S18-2 (MRPS18B),                  | <b>2.832</b> |
| 25 | <b>SCARA5</b>  | Homo sapiens scavenger receptor class A, member 5 (putative) (SCARA5), mRNA                            | <b>2.817</b> |
| 26 | <b>RLIM</b>    | Homo sapiens ring finger protein, LIM domain interacting                                               | <b>2.784</b> |
| 27 | <b>CASP9</b>   | Homo sapiens caspase 9 splice variant (CASP9) mRNA, complete                                           | <b>2.776</b> |
| 28 | <b>CDKN1A</b>  | Homo sapiens cyclin-dependent kinase inhibitor 1A (p21, Cip1)                                          | <b>2.744</b> |
| 29 | <b>VPS16</b>   | Homo sapiens vacuolar protein sorting 16 homolog (S. cerevisiae),                                      | <b>2.732</b> |
| 30 | <b>HSD11B2</b> | Bos taurus 11-beta-hydroxysteroid dehydrogenase type 2 mRNA,                                           | <b>2.722</b> |
| 31 | <b>CALM2</b>   | Bos taurus similar to calmodulin 2 (LOC514457)                                                         | <b>2.681</b> |
| 32 | <b>HBB</b>     | Homo sapiens hemoglobin, beta (HBB), mRNA                                                              | <b>2.604</b> |
| 33 | <b>GLB1</b>    | Bos taurus GLB1 mRNA for galactosidase, beta 1, complete cds                                           | <b>2.546</b> |
| 34 | <b>RPS4X</b>   | Homo sapiens ribosomal protein S4, X-linked (RPS4X), mRNA                                              | <b>2.519</b> |
| 35 | <b>PANX1</b>   | Homo sapiens mRNA for pannexin 1 (PANX1 gene),                                                         | <b>2.379</b> |

|    |                |                                                                                               |              |
|----|----------------|-----------------------------------------------------------------------------------------------|--------------|
| 36 | <b>PRDX2</b>   | Bos taurus peroxiredoxin 2 (PRDX2), mRNA                                                      | <b>2.378</b> |
| 37 | <b>RNF121</b>  | Homo sapiens ring finger protein 121 (RNF121), transcript variant                             | <b>2.36</b>  |
| 38 | <b>HSP90B1</b> | Bos taurus tumor rejection antigen (gp96) 1 / heat shock protein 90kDa beta (Grp94), member 1 | <b>2.322</b> |
| 39 | <b>POMP</b>    | Bos taurus proteasome maturation protein (POMP), mRNA                                         | <b>2.294</b> |
| 40 | <b>CALU</b>    | Homo sapiens calumein (Calu) mRNA, complete cds                                               | <b>2.249</b> |
| 41 | <b>VPS33A</b>  | Homo sapiens vacuolar protein sorting 33 homolog A (S. cerevisiae)                            | <b>2.231</b> |
| 42 | <b>ZFYVE20</b> | Homo sapiens zinc finger, FYVE domain containing 20, mRNA (cDNA                               | <b>2.159</b> |
| 43 | <b>RGS3</b>    | Bos taurus regulator of G-protein signaling 3 (RGS3), mRNA                                    | <b>2.15</b>  |
| 44 | <b>RPL37A</b>  | Bos taurus ribosomal protein L37a (RPL37A), mRNA                                              | <b>2.123</b> |
| 45 | <b>HDAC2</b>   | Bos taurus histone deacetylase 2 (HDAC2), mRNA                                                | <b>2.102</b> |
| 46 | <b>NRP1</b>    | Homo sapiens neuropilin 1 (NRP1)                                                              | <b>2.102</b> |
| 47 | <b>EMP2</b>    | Bos taurus epithelial membrane protein 2 (EMP2), mRNA                                         | <b>2.091</b> |
| 48 | <b>MALAT1</b>  | Homo sapiens MALAT1 mRNA, complete sequence                                                   | <b>2.046</b> |
