# Supplementary material for: Use of Both Cumulus Cells’ Transcriptomic Markers and Zona Pellucida Birefringence to Select Developmentally Competent Oocytes in Human Assisted Reproductive Technologies
Source: PubMed Central journal article supplement (PMC4315169; doi:10.1186/1471-2164-16-s1-s9), 2015-01-15
Supplement: 1471-2164-16-S1-S9-S2.pdf [file 1471-2164-16-S1-S9-S2.pdf]

**Supplemental table 2: List of under-expressed genes in ZGP versus ZBNP groups (ZBNP/ZGP ratio  $\geq 2$ ) following microarray analysis at FDR=5%**

|    | <b>Gene</b>    | <b>GenBank name</b>                                                        | <b>Fold</b>  |
|----|----------------|----------------------------------------------------------------------------|--------------|
| 1  | <b>SLC25A3</b> | Homo sapiens solute carrier family 25 (mitochondrial carrier;              | <b>3.907</b> |
| 2  | <b>HNRNPM</b>  | heterogeneous nuclear ribonucleoprotein M                                  | <b>3.206</b> |
| 3  | <b>CCNA2</b>   | Homo sapiens cyclin A2, mRNA                                               | <b>3.087</b> |
| 4  | <b>ARFGAP3</b> | Homo sapiens ADP-ribosylation factor GTPase activating protein             | <b>3.018</b> |
| 5  | <b>RPL10</b>   | Homo sapiens ribosomal protein L10 (RPL10), mRNA                           | <b>2.843</b> |
| 6  | <b>MT-CYB</b>  | Homo sapiens mitochondrially encoded cytochrome b                          | <b>2.747</b> |
| 7  | <b>TAX1BP1</b> | Homo sapiens Tax1 (human T-cell leukemia virus type I) binding protein 1   | <b>2.712</b> |
| 8  | <b>HSPA8</b>   | Homo sapiens heat shock 70kDa protein 8 (HSPA8), transcript variant        | <b>2.684</b> |
| 9  | <b>CYP11A1</b> | Homo sapiens cytochrome P450, family 11, subfamily A, polypeptide          | <b>2.613</b> |
| 10 | <b>ENO1</b>    | Homo sapiens mRNA for enolase 1 variant, clone: adSE00169                  | <b>2.585</b> |
| 11 | <b>FDPS</b>    | Human farnesyl pyrophosphate synthetase mRNA, complete cds                 | <b>2.567</b> |
| 12 | <b>FOSB</b>    | Homo sapiens FBJ murine osteosarcoma viral oncogene homolog B              | <b>2.407</b> |
| 13 | <b>RPL35A</b>  | Homo sapiens ribosomal protein L35a, mRNA (cDNA clone MGC:9770             | <b>2.357</b> |
| 14 | <b>LAMB1</b>   | Homo sapiens laminin, beta 1 (LAMB1), mRNA                                 | <b>2.351</b> |
| 15 | <b>DPH1</b>    | Homo sapiens DPH1 homolog                                                  | <b>2.333</b> |
| 16 | <b>MT-ATP6</b> | Homo sapiens ATP synthase 6 mRNA, complete cds; mitochondrial              | <b>2.258</b> |
| 17 | <b>TNFAIP1</b> | Homo sapiens tumor necrosis factor, alpha-induced protein 1 (endothelial), | <b>2.238</b> |
| 18 | <b>IQWD1</b>   | Homo sapiens IQ motif and WD repeats 1, mRNA (cDNA clone IMAGE:3929120),   | <b>2.214</b> |
| 19 | <b>TMED5</b>   | Homo sapiens transmembrane emp24 protein transport domain containing       | <b>2.209</b> |
| 20 | <b>HLA-DRA</b> | Homo sapiens major histocompatibility complex, class II, DR alpha          | <b>2.187</b> |
| 21 | <b>RPL14</b>   | Homo sapiens ribosomal protein L14, mRNA (cDNA clone MGC:88594             | <b>2.14</b>  |
| 22 | <b>TTC15</b>   | Homo sapiens tetratricopeptide repeat domain 15                            | <b>2.139</b> |
| 23 | <b>ZNF232</b>  | Homo sapiens mRNA similar to zinc finger protein 232 (cDNA clone           | <b>2.083</b> |
| 24 | <b>RPS13</b>   | Homo sapiens ribosomal protein S13 (RPS13), mRNA                           | <b>2.054</b> |
| 25 | <b>IFITM3</b>  | Homo sapiens interferon induced transmembrane protein 3 (1-8U)             | <b>2.031</b> |
| 26 | <b>C20orf4</b> | Homo sapiens chromosome 20 open reading frame 4 (C20orf4), mRNA            | <b>2.019</b> |
| 27 | <b>DOM3Z</b>   | Homo sapiens dom-3 homolog Z (C. elegans), mRNA (cDNA clone MGC:29502      | <b>2.006</b> |
